# Supplementary material for: Synergistic pest outbreaks and climate extremes amplify forest health risks
Source: Research Square preprint supplement (doi:10.21203/rs.3.rs-7373596/v1), 2025-09-09
Supplement: Supplementary file 1 [file 958538546b8c3df08027a4e3.docx]

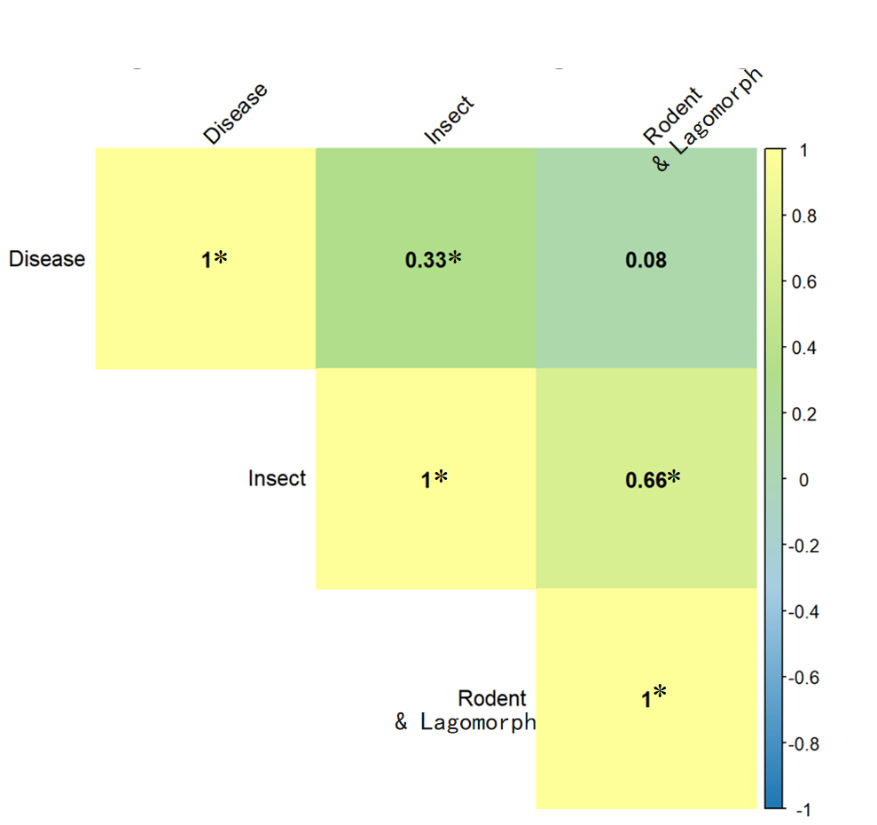


Fig S1 Pearson correlation among unit-area damage rates of forest diseases, insect pests, and rodent pests across Chinese provinces.

Table S1 Summary of GLMM results for the effects of extreme climate frequencies on forest pest damages in China (2014–2023).

| Pest Type | Predictor | Estimate | Std. Error | 95% CI Lower | 95% CI Upper | *P*-value | Signif. |
| --- | --- | --- | --- | --- | --- | --- | --- |
| Disease | (Intercept) | -0.138 | 0.24 | -0.608 | 0.331 | 0.5633 |  |
| Drought_Freq | 0.013 | 0.002 | 0.01 | 0.016 | <0.001 | *** |
| Extreme_Rain | 0.091 | 0.023 | 0.047 | 0.136 | <0.001 | *** |
| Insect | (Intercept) | 5.527 | 1.044 | 3.48 | 7.574 | <0.001 | *** |
| Drought_Freq | 0 | 0.002 | -0.004 | 0.004 | 0.9368 |  |
| Extreme_Rain | 0.064 | 0.031 | 0.004 | 0.125 | 0.038 | * |
| Rodent & lagomorph | (Intercept) | 2.758 | 0.958 | 0.879 | 4.636 | 0.004 | ** |
| Drought_Freq | -0.006 | 0.002 | -0.01 | -0.001 | 0.014 | * |
| Extreme_Rain | -0.079 | 0.052 | -0.18 | 0.022 | 0.1266 |  |
